# Supplementary material for: Effectiveness of Pricing Strategies on French Fries and Fruit Purchases among University Students: Results from an On-Campus Restaurant Experiment
Source: PLoS One. 2016 Nov 3;11(11):e0165298. doi: 10.1371/journal.pone.0165298 (PMC5094693; doi:10.1371/journal.pone.0165298)
Supplement: S2 Fig — (XLSX) [file pone.0165298.s002.xlsx]

## Sheet: 20-04 tem 24-04
Fruit experiment - baseline measurement (20/04 - 24/04)
		WITHOUT FRUIT		WITH FRUIT
2015-04-20				Male	Female
MENU 1	Chicken with warm vegetables	180		62	43
MENU 2	White and black tripe with white cabbage	61		32	12
HEALTH	Sole with leek and chive sauce	36		4	6
VEGGIE	Vegetarian videe	42		14	18
PASTA BAR	Tortelloni with pesto garden herbs and tomato sauce	63		18	13
WOK	Pork with curry	43		11	10
COLD DISH		2		0	2
2015-04-21				Male	Female
MENU 1	Steak with pepper sauce and broccoli	170		70	27
MENU 2	Turkey balls in tomato sauce	133		38	27
HEALTH	Fish with grilled eggplants	41		6	17
VEGGIE	Quiche with leek	17		5	12
PASTA BAR	Whole-wheat pasta with vegetables in soya cream sauce	41		11	11
WOK	Spring risotto	42		9	17
COLD DISH		5		1	2
2015-04-22				Male	Female
MENU 1	Escalope Milanese style	102		62	25
MENU 2	Cod Eastern style	36		21	12
HEALTH
VEGGIE	Vegetable-cheese disc with spinach in cream sauce	36		12	12
PASTA BAR	Spaghetti Bolognaise	99		37	31
WOK
COLD DISH		1		1
2015-04-23				Male	Female
MENU 1	Fish-sticks with mixed salad and tartaar sauce	170		38	49
MENU 2	Iskender kebab	189		66	19
HEALTH	Chicken Italian style	67		25	22
VEGGIE	Vegetable lasagna	62		10	11
PASTA BAR	Cannelloni Verdi	72		10	16
WOK	Wok with lamb	22		8	2
COLD DISH		5		1	1
2015-04-24				Male	Female
MENU 1	Chicken Bombay	112		47	20
MENU 2	Hamburger with peas and carrots	63		35	15
HEALTH	Prawn skewer with exotic salad	30		12	12
VEGGIE	Gyros	26		12	9
PASTA BAR	Pasta with 4 cheeses sauce and spinach	45		17	8
WOK	Wok with beef	25		8	8
COLD DISH		2		2	1
WEEK TOTAL		2040		705	490

## Sheet: 4-05 tem 8-05
Fruit experiment - € 0.50 (4/05 - 8/05)
		WITHOUT FRUIT		WITH FRUIT
2015-05-04				Male	Female
MENU 1	Chicken with warm vegetables	165		96	78
MENU 2	White and black tripe with white cabbage	73		95	26
HEALTH	Sole with leek and chive sauce	38		16	17
VEGGIE	Vegetarian videe	24		16	28
PASTA BAR	Tortelloni with pesto garden herbs and tomato sauce	39		31	29
WOK	Pork with curry	25		25	15
COLD DISH		1		2	1
2015-05-05				Male	Female
MENU 1	Steak with pepper sauce and broccoli	102		113	49
MENU 2	Turkey balls in tomato sauce	67		74	77
HEALTH	Fish with grilled eggplants	20		31	18
VEGGIE	Quiche with leek	31		36	42
PASTA BAR	Whole-wheat pasta with vegetables in soya cream sauce	63		39	29
WOK	Spring risotto	10		15	7
COLD DISH		1		1	9
2015-05-06				Male	Female
MENU 1	Escalope Milanese style	83		133	38
MENU 2	Cod Eastern style	38		51	19
HEALTH		24		21	22
VEGGIE	Vegetable-cheese disc with spinach in cream sauce	15		21	12
PASTA BAR	Spaghetti Bolognaise	41		41	40
WOK		24		19	18
COLD DISH		7		2	5
2015-05-07				Male	Female
MENU 1	Fish-sticks with mixed salad and tartaar sauce	108		157	51
MENU 2	Iskender kebab	38		57	29
HEALTH	Chicken Italian style	17		15	19
VEGGIE	Vegetable lasagna	39		15	39
PASTA BAR	Cannelloni Verdi	95		89	55
WOK	Wok with lamb	4		8	10
COLD DISH		3		0	2
2015-05-08				Male	Female
TOTAL 8/05		250		231	123
WEEK TOTAL		1445		1450	907

## Sheet: 18-05 tem 22-05
Fruit experiment - € 1 (18/05 - 22/05)
		WITHOUT FRUIT		WITH FRUIT
2015-05-18				Male	Female
MENU 1	Chicken with warm vegetables	11		15	36
MENU 2	White and black tripe with white cabbage	50		85	39
HEALTH	Sole with leek and chive sauce	24		45	37
VEGGIE	Vegetarian videe	43		63	66
PASTA BAR	Tortelloni with pesto garden herbs and tomato sauce	19		14	14
WOK	Pork with curry	34		38	34
COLD DISH		1		3	2
2015-05-19				Male	Female
MENU 1	Steak with pepper sauce and broccoli	96		186	95
MENU 2	Turkey balls in tomato sauce	24		49	50
HEALTH	Fish with grilled eggplants	9		28	20
VEGGIE	Quiche with leek	11		10	12
PASTA BAR	Whole-wheat pasta with vegetables in soya cream sauce	30		66	32
WOK	Spring risotto	16		22	14
COLD DISH		2		3	8
2015-05-20				Male	Female
MENU 1	Escalope Milanese style	65		213	100
MENU 2	Cod Eastern style	14		36	13
HEALTH		21		37	34
VEGGIE	Vegetable-cheese disc with spinach in cream sauce	14		27	36
PASTA BAR	Spaghetti Bolognaise	16		45	63
WOK		12		34	22
COLD DISH		4		4	3
2015-05-21				Male	Female
MENU 1	Fish-sticks with mixed salad and tartaar sauce	75		186	83
MENU 2	Iskender kebab	10		77	35
HEALTH	Chicken Italian style	18		25	33
VEGGIE	Vegetable lasagna	14		39	37
PASTA BAR	Cannelloni Verdi	30		83	52
WOK	Wok with lamb	8		14	18
COLD DISH		1		2	12
2015-05-22				Male	Female
MENU 1	Chicken Bombay	22		100	41
MENU 2	Hamburger with peas and carrots	26		121	43
HEALTH	Prawn skewer with exotic salad	6		28	18
VEGGIE	Gyros	9		27	25
PASTA BAR	Pasta with 4 cheeses sauce and spinach	14		22	24
WOK	Wok with beef	20		42	16
COLD DISH		1		2	0
WEEK TOTAL		770		1791	1167
